# Supplementary material for: A Rapid LC-HRMS Method for the Determination of Domoic Acid in Urine Using a Self-Assembly Pipette Tip Solid-Phase Extraction
Source: PubMed Central journal article supplement (PMC4728532; doi:10.3390/toxins8010010), 2015-12-29
Supplement: toxins-08-00010-s001.pdf [file toxins-08-00010-s001.pdf]

# Supplementary Materials: A Rapid LC-HRMS Method for the Determination of Domoic Acid in Urine Using a Self-Assembly Pipette Tip Solid-Phase Extraction

Yiping Zhang, Dawei Chen and Zhuan Hong

## Chromatographic Conditions for Analysis of Domoic Acid in Three Different Columns

The aqueous solvent (A) consisted of a mixture of 0.1% of formic acid and 4 mM ammonium formate in water, and the organic phase (B) was acetonitrile with 0.1% formic acid.

HILIC column: 90 min 2% B, 0–2 min 90% B, 2–5 min 50% B, 5–7 min 50% B, 7–7.1 min 90% B, 7.1–10 min, 90% B. The flow rate was set to 300  $\mu$ L/min with a resulting overall runtime of 10 min. The injection volume was 5  $\mu$ L.

C<sub>18</sub> column: 0 min 5% B, 0–2 min 5% B, 2–5 min 50% B, 5–7 min 100% B, 7–7.1 min 5% B, 7.1–10 min, 5% B. The flow rate was set to 300  $\mu$ L/min with a resulting overall runtime of 10 min. The injection volume was 5  $\mu$ L.

T<sub>3</sub> column: 0 min 2% B, 0–2 min 2% B, 2–5 min 50% B, 5–7 min 100% B, 7–7.1 min 2% B, 7.1–10 min, 2% B. The flow rate was set to 200  $\mu$ L/min with a resulting overall runtime of 10 min. The injection volume was 5  $\mu$ L.

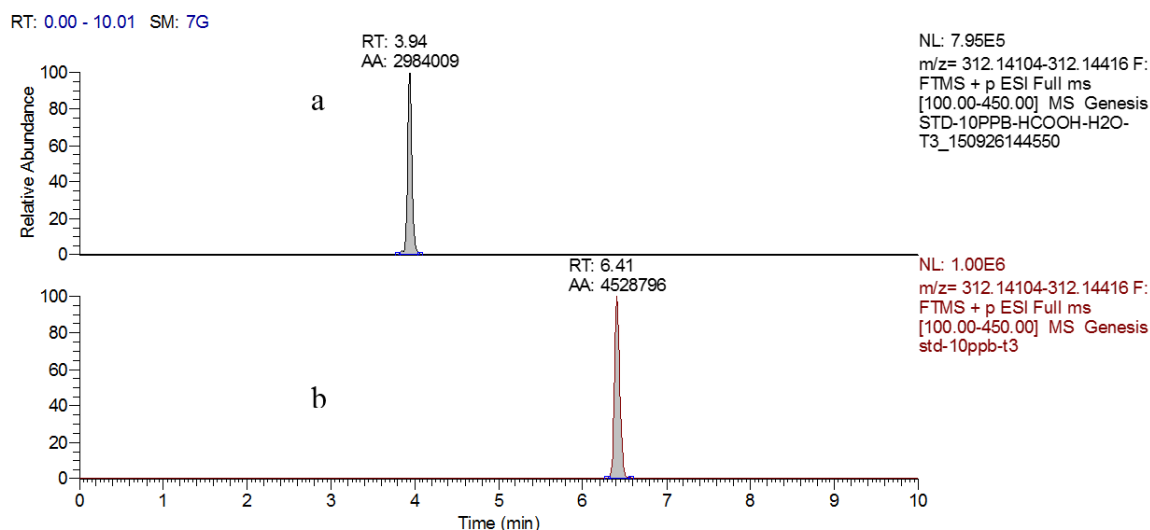

**Figure S1.** The chromatographic behavior for DA under different linear gradient mode in T<sub>3</sub> column with the flow rate of 200  $\mu$ L/min; (a) 0 min 2% B, 0–2 min 2% B, 2–5 min 50% B, 5–7 min 100% B, 7–7.1 min 2% B, 7.1–10 min, 2% B; (b) 0 min 10% B, 0–2 min 10% B, 2–5 min 50% B, 5–7 min 100% B, 7–7.1 min 10% B, 7.1–10 min, 10% B.

std-20ppb #318 RT: 6.42 AV: 1 SM: 7G NL: 2.83E5  
 F: FTMS + p ESI Full ms2 312.14@hcd28.00 [50.00-660.00]

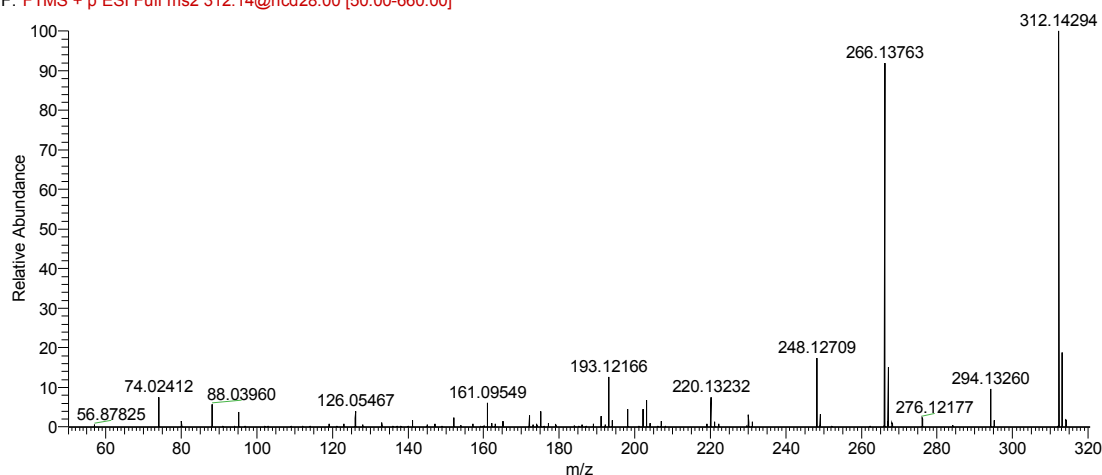

**Figure S2.** A full scan of all fragmented ions originating from the parent ion (312.14  $m/z$ ) for DA.

**Table S1.** The extraction conditions for optimization of each parameter by analyzing spiked urine samples containing 1  $\mu\text{g/L}$  DA.

| Experiments                                | The Type of Sorbent                                            | pH   | The Amount (mg) | The Number of Aspirating/Dispensing Cycles | The Concentration of Formic Acid (%) | The Volume of Eluent ( $\mu\text{L}$ ) |
|--------------------------------------------|----------------------------------------------------------------|------|-----------------|--------------------------------------------|--------------------------------------|----------------------------------------|
| The type of sorbent                        | C <sub>18</sub> , C <sub>s</sub> , PEP, SCX, SAX, PAX, and PCX | 10   | 10              | 5                                          | 5                                    | 5 × 200                                |
| pH                                         | PAX                                                            | 4–10 | 10              | 5                                          | 5                                    | 5 × 200                                |
| The amount of sorbent                      | PAX                                                            | 10   | 1–15            | 5                                          | 5                                    | 5 × 200                                |
| The number of aspirating/dispensing cycles | PAX                                                            | 10   | 10              | 1–20                                       | 5                                    | 5 × 200                                |
| The concentration of formic acid           | PAX                                                            | 10   | 10              | 3                                          | 0.5–10                               | 5 × 200                                |
| The volume of eluent                       | PAX                                                            | 10   | 10              | 3                                          | 5                                    | 1 × 200–5 × 200                        |

RT: 0.00 - 10.01 SM: 7G

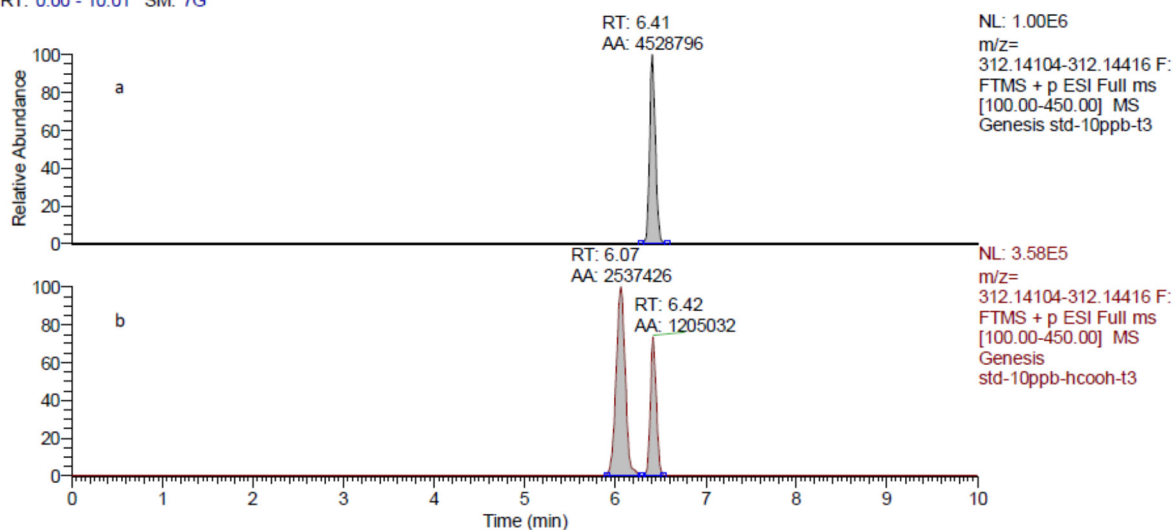

**Figure S3.** The solvent effects for DA under different solvent in T3 column (a) 5% formic acid-water; (b) 5% formic acid-acetonitrile.

**Table S2.** Efficiency of extraction (%) as a function of three independent variables.

| <i>Std</i> | <b>Run</b> | <b>Factor A (mg)</b> | <b>Factor B (%)</b> | <b>Factor C (<math>\mu</math>L)</b> | <b>Response Y (%)</b> |
|------------|------------|----------------------|---------------------|-------------------------------------|-----------------------|
| 18         | 1          | 10                   | 5                   | 2 $\times$ 200                      | 98                    |
| 13         | 2          | 10                   | 5                   | 2 $\times$ 100                      | 89                    |
| 7          | 3          | 7.5                  | 6.5                 | 2 $\times$ 250                      | 85                    |
| 4          | 4          | 12.5                 | 6.5                 | 2 $\times$ 150                      | 95                    |
| 20         | 5          | 10                   | 5                   | 2 $\times$ 200                      | 101                   |
| 6          | 6          | 12.5                 | 3.5                 | 2 $\times$ 250                      | 92                    |
| 12         | 7          | 10                   | 8                   | 2 $\times$ 200                      | 99                    |
| 2          | 8          | 12.5                 | 3.5                 | 2 $\times$ 150                      | 91                    |
| 10         | 9          | 15                   | 5                   | 2 $\times$ 200                      | 94                    |
| 19         | 10         | 10                   | 5                   | 2 $\times$ 200                      | 97                    |
| 11         | 11         | 10                   | 2                   | 2 $\times$ 200                      | 83                    |
| 15         | 12         | 10                   | 5                   | 2 $\times$ 200                      | 99                    |
| 17         | 13         | 10                   | 5                   | 2 $\times$ 200                      | 97                    |
| 14         | 14         | 10                   | 5                   | 2 $\times$ 300                      | 98                    |
| 5          | 15         | 7.5                  | 3.5                 | 2 $\times$ 250                      | 92                    |
| 1          | 16         | 7.5                  | 3.5                 | 2 $\times$ 150                      | 85                    |
| 8          | 17         | 12.5                 | 6.5                 | 2 $\times$ 250                      | 96                    |
| 16         | 18         | 10                   | 5                   | 2 $\times$ 200                      | 93                    |
| 3          | 19         | 7.5                  | 6.5                 | 2 $\times$ 150                      | 88                    |
| 9          | 20         | 5                    | 5                   | 2 $\times$ 200                      | 73                    |

**Table S3.** ANOVA for response surface quadratic model of DA.

| <b>Source</b>   | <b>Sum of Squares</b> | <b>df</b>          | <b>Mean Square</b> | <b>F-Value</b> | <b>P-Value</b> |
|-----------------|-----------------------|--------------------|--------------------|----------------|----------------|
| Model           | 766.1591              | 9                  | 85.12879           | 6.56904        | 0.0035         |
| A               | 272.25                | 1                  | 272.25             | 21.00842       | 0.0010         |
| B               | 81                    | 1                  | 81                 | 6.250438       | 0.0314         |
| C               | 36                    | 1                  | 36                 | 2.777973       | 0.1265         |
| AB              | 18                    | 1                  | 18                 | 1.388986       | 0.2659         |
| AC              | 0.5                   | 1                  | 0.5                | 0.038583       | 0.8482         |
| BC              | 12.5                  | 1                  | 12.5               | 0.964574       | 0.3492         |
| A <sup>2</sup>  | 322.1591              | 1                  | 322.1591           | 24.8597        | 0.0005         |
| B <sup>2</sup>  | 73.05195              | 1                  | 73.05195           | 5.63712        | 0.0390         |
| C <sup>2</sup>  | 29.30195              | 1                  | 29.30195           | 2.261111       | 0.1636         |
| Lack of fit     | 94.09091              | 5                  | 18.81818           | 2.650448       | 0.1542         |
| Pure error      | 35.5                  | 5                  | 7.1                | -              | -              |
| Corrected total | 895.75                | 19                 | -                  | -              | -              |
| SD              | 3.60                  | R <sup>2</sup>     | 0.8553             | -              | -              |
| CV              | 3.90                  | adj-R <sup>2</sup> | 0.7251             | -              | -              |
